# Supplementary material for: Achievement of low-density lipoprotein cholesterol goals in 18 countries outside Western Europe: The International ChoLesterol management Practice Study (ICLPS)
Source: PubMed Central journal article supplement — Eur J Prev Cardiol. 2018 May 17;25(10):1087–94. doi: 10.1177/2047487318777079 (PMC6039862; doi:10.1177/2047487318777079), 2018-05-17
Supplement: Appendix.pdf [file Appendix.pdf]

# Achievement of low-density lipoprotein cholesterol goals in 18 countries outside of Western Europe: the International ChoLesterol management Practice Study (ICLPS)

## Supplementary Appendix

### Contents

|                                                                                                                                                                                                                                                                                                                                                                                  |    |
|----------------------------------------------------------------------------------------------------------------------------------------------------------------------------------------------------------------------------------------------------------------------------------------------------------------------------------------------------------------------------------|----|
| Statistical analysis .....                                                                                                                                                                                                                                                                                                                                                       | 2  |
| Supplementary Table 1. List of ICLPS investigators and patient enrolment numbers.....                                                                                                                                                                                                                                                                                            | 3  |
| Supplementary Table 2. Physician characteristics, by country, overall and region (Middle-East and Latin-America) .....                                                                                                                                                                                                                                                           | 7  |
| Supplementary Table 3. Characteristics of the study population, by cardiovascular risk level (calculated using SCORE <sup>1</sup> ) .....                                                                                                                                                                                                                                        | 9  |
| Supplementary Table 4. Lipid laboratory values, overall and by cardiovascular risk level (calculated using SCORE <sup>1</sup> ) at time of first diagnosis, before starting lipid-lowering therapy .....                                                                                                                                                                         | 12 |
| Supplementary Table 5. Selected antithrombotic and other cardiovascular therapies, overall and by cardiovascular risk level .....                                                                                                                                                                                                                                                | 13 |
| Supplementary Table 6. Change in lipid values after starting LLT (after first diagnosis of dyslipidaemia) .....                                                                                                                                                                                                                                                                  | 14 |
| Supplementary Table 7. Achievement of target LDL-C levels according to use of high- or low-risk country SCORE chart: sensitivity analysis .....                                                                                                                                                                                                                                  | 15 |
| Supplementary Figure 1. Patient flow chart .....                                                                                                                                                                                                                                                                                                                                 | 16 |
| Supplementary Figure 2 Physician-estimated assessment of patient cardiovascular risk versus calculated risk (calculated using SCORE <sup>1</sup> ) (weighted Kappa 0.22 (95% confidence interval 0.21–0.23). Physician-estimated risk was unknown in 1 patient. ....                                                                                                             | 17 |
| Supplementary Figure 3. Low-density lipoprotein cholesterol value at time of first diagnosis, before starting lipid-lowering treatment, overall and according to cardiovascular risk level (calculated using Systemic Coronary Risk Estimation, SCORE <sup>1</sup> ) .....                                                                                                       | 18 |
| Supplementary Figure 4. Patients who achieved the 2011 ESC/EAS LDL-C goals, <sup>2</sup> according to physician-estimated or calculated cardiovascular risk level (calculated using SCORE <sup>1</sup> ). EAS, European Atherosclerosis Society; ESC, European Society of Cardiology; LDL-C, low-density lipoprotein cholesterol; SCORE, Systemic Coronary Risk Estimation. .... | 19 |
| References .....                                                                                                                                                                                                                                                                                                                                                                 | 20 |

## **Statistical analysis**

### ***Sample size calculation***

The sample size was computed to ensure sufficient precision in the assessment of qualitative criteria, with stratification by country. Based on the assumption that approximately 528 centres in 19 countries would participate, and that approximately 10,120 patients would be enrolled (100–2000 per country), the precision in the assessment of qualitative criteria would range from  $\pm 9.80\%$  in countries enrolling 100 patients, 50% of whom would achieve the LDL-C target, to  $\pm 1.31\%$  in countries enrolling 2000 patients, 10% of whom would achieve the target.

### ***SCORE (Systemic Coronary Risk Estimation) algorithm and risk stratification***

The SCORE algorithm assesses 10-year risk of fatal cardiovascular disease, based on sex, age, smoking status, systolic blood pressure, and total serum cholesterol. In this study, pre-treatment total serum cholesterol values were used; consequently, not all patients could be classified according to risk level. Low-risk patients were those with a SCORE value  $<1\%$  and moderate risk was a SCORE value  $\geq 1\%$  and  $<5\%$ . Patients with a SCORE value  $\geq 5\%$  or with systolic blood pressure  $\geq 180$  mmHg and diastolic blood pressure  $\geq 110$  mmHg or with familial hypercholesterolemia per the Dutch Lipid Clinic Network algorithm (definite or probable) or with diabetes without target organ damage were classified in the high-risk group. The very-high-risk group included patients with a 10-year risk of fatal cardiovascular disease  $\geq 10\%$  or with at least one of the following conditions: documented coronary artery disease (CAD), cerebrovascular disease, or peripheral artery disease, type 2 diabetes with target organ damage, and history of chronic kidney disease (glomerular filtration rate  $<60$  mL/min/1.73 m<sup>2</sup>). Patients without a serious pathology classifying them as very high or high cardiovascular risk, and in whom the SCORE could not be calculated due to missing data (most commonly baseline LDL-C) were categorized as non-assessable.

### ***Multivariable logistic regression model***

A multivariable logistic regression model was developed to test the relationship between failure to achieve LDL-C targets and demographic, clinical, and treatment characteristics (sex, smoking status, familial hypercholesterolemia diagnosis, SCORE risk level,<sup>1</sup> history of chronic kidney disease, congestive heart failure, neurocognitive disorders, hypertension, diabetes, documented coronary artery disease [CAD], cerebrovascular disease, or peripheral artery disease, body mass index, waist circumference [International Diabetes Federation], blood pressure, LDL-C value at time of first diagnosis known (versus not known), statin dose, reported statin intolerance, aspirin, chronic medications).

Univariate analyses were used to determine which variables should be included in the multivariable analysis. Each variable with a univariate P-value  $<0.2$  was included in the multivariable model. Terms with the highest P-value were sequentially removed from the model until all remaining variables had individual P-values  $<0.05$ .

**Supplementary Table 1. List of ICLPS investigators and patient enrolment numbers**

| Region (no. of patients enrolled, %) | Country      | No. patients enrolled | Principal Investigator / National Coordinator                                                                                                                                                                                                                        |
|--------------------------------------|--------------|-----------------------|----------------------------------------------------------------------------------------------------------------------------------------------------------------------------------------------------------------------------------------------------------------------|
| Eastern Europe (n=846, 9.3%)         | Russia       | 349                   | Yuri Karpov (Principal Investigator and National Coordinator), Russian Cardiology Research & Development Complex, Moscow, Russia                                                                                                                                     |
|                                      | Ukraine      | 497                   | Olena Mitchenko (National Coordinator), National scientific center: "M.D. Strazhesko institute of cardiology" MAS of Ukraine, Narodnogo Opolcheniya Kyiv, Ukraine                                                                                                    |
| Asia (n=3546, 39.2%)                 | Bangladesh   | 499                   | Abdul Wadud Chowdhury (Principal Investigator and National Coordinator), Dhaka medical College Hospital, Dhaka, Bangladesh                                                                                                                                           |
|                                      | India        | 2013                  | Kaul Upendra (Principal Investigator and National Coordinator), Fortis Escorts Heart Institute & Research Centre, Fortis hospitals, New Delhi, India                                                                                                                 |
|                                      | South Korea  | 1034                  | Kim Sung Rae (National Coordinator), Bucheon ST. Mary's Hospital, Wonmi-gu, Bucheon-si, Gyeonggi-do, Republic of Korea.<br>Choi Sung-Hee (National Coordinator), Seoul National University Bundang Hospital, Bundang-gu, Seongnam-si, Gyeonggi-do, Republic of Korea |
| Africa (n=881, 9.7%)                 | Algeria      | 485                   | Abdelkrim Berrah (National Coordinator), Service de Médecine interne, CHU mohamed Lamine Debaghine Bab El Oued, 16000 Algiers, Algeria                                                                                                                               |
|                                      | South Africa | 396                   | Dirk Blom (Principal Investigator and National Coordinator), Lipid Laboratory, University of Cape Town, Cape Town, South Africa                                                                                                                                      |
| Middle-East (n=1890, 20.9%)          | Israel       | 99                    | Yossi Azuri (Principal Investigator and National Coordinator), Maccabi health care Services, Tel Aviv, Israel                                                                                                                                                        |
|                                      | Kuwait       | 150                   | Mohammed Zubaid (Principal Investigator and National Coordinator), Mubarak Hospital, Jabriya, Kuwait                                                                                                                                                                 |
|                                      | Oman         | 97                    | Khalid Al Rasahdi (Principal Investigator and National Coordinator), Sultan Qaboos University, Muscat, Oman                                                                                                                                                          |
|                                      | Lebanon      | 200                   | Rabih Azar (Principal Investigator and National Coordinator), Hotel Dieu De France Hospital, Rue al Syrian, Ashrafieh, Beirut, Lebanon                                                                                                                               |
|                                      | Saudi Arabia | 231                   | Mohammed Balgaith (Principal Investigator and National Coordinator), Cardiology Center, National Guard Hospital, Riyadh, Saudi Arabia                                                                                                                                |
|                                      | Turkey       | 830                   | Meral Kayıkçıoğlu (Principal Investigator and National Coordinator), Ege University Faculty of Medicine Department of Cardiology, Bornova, İzmir, Turkey                                                                                                             |

|                                  |                      |      |                                                                                                                                                                                       |
|----------------------------------|----------------------|------|---------------------------------------------------------------------------------------------------------------------------------------------------------------------------------------|
|                                  | United Arab Emirates | 283  | Wael Mahameed (National Coordinator), SKMC, Abu Dhabi, United Arab Emirates                                                                                                           |
| Latin-America<br>(n=1886, 20.8%) | Argentina            | 307  | Carlos Alberto Cuneo (Principal Investigator and National Coordinator), Prevencion Cardiovascular Salta, Provincia de Salta, Argentina                                                |
|                                  | Brazil               | 499  | Raul Santos (Principal Investigator and National Coordinator), Instituto Do Coração Do Hospital Das Clínicas Da Faculdade De Medicina Da Universidade De São Paulo, São Paulo, Brazil |
|                                  | Colombia             | 454  | Alvaro J Ruiz (National Coordinator), San Ignacio Hospital, Pontificia Universidad Javeriana, Bogotá, Colombia                                                                        |
|                                  | Mexico               | 626  | Carlos A. Aguilar Salinas (Principal Investigator), Instituto Nacional de Nutricion Vasco de Quiroga 15, Mexico                                                                       |
| Total population                 |                      | 9049 |                                                                                                                                                                                       |

#### Investigators who enrolled at least 1 patient

**Algeria:** Hadjissa Khadidja, Zebbar Nacerddine, Gouader Moussa, Senouci Fatima, Benissad Houria, Tazdait Rafik, Hamidouche Karima, Ayache Ahmed, Achaibou Rachid, Dahmane Saida, Benkhodja Mohamed Bachir, Louaifi Ali, Remili Rachid, Benbouabdellah Belkacem, Hadjkali Abdelhamid, Manseur Fahima, Bertal Sabra Amina, Methia Nadira, Kadour Fatima, Latreche Samia, Agrane Khadidja, Menzou Farouk, Kichou Brahim, Djellaoudji Azzouz, Khelil Saida, Ghemri Sofiane, Nibouche Djamel Eddine, Djeghri Nora, Belguedj Rinda, AbdelBaki Mourad, Kachenoura Aldjia, Krim Messaad, Belkadi Zahoua, Henine Nora, Aoudia Yazid, Aouiche Samir, Yakhou Mohamed, Belhadj Fatima, Merdjana Karima, Ziani Samia, Benatmane Houria, Zellat Khiera, Faraoun Khadra, Douar Malika, Djafri Yasmina, Bouamrane Nadia, Cherief Fadila, Khellaf Hadda, Zidani Hocine, Baghous Houssef.

**Argentina:** Carlos Alberto Cuneo, Gabriel Dario Waisman, Jorge Roberto Aiub, Alejandro Hershson, Carol Kotliar, Julio Andres Vallejos, Juan Carlos Medrano, Alberto Juan Lorenzatti, Alfredo Lozada, Pablo Corral.

**Bangladesh:** Chowdhury Abdul Wadud, Haque Azizul, Chakraborti Rajashish, Hussain Md. Tofazzal, Reza Salim, Uddin Mir Jamal, Amin Mohammad Gaffar, Islam Abul Hasan Md. Waliul, Rahman Md. Toufiqur, Akter Mohammed Shamim, Khan Kaiser Nasrullah, Hossain Tanjina, Prasad Indrajit, Amin Ahsanul Haque, Ishaque S M, Habib Maruf Bin, Ali Hassan Kazi, Rabbani Raihan, Bhowmik Nirmalendu Bikash, Hassan Mohammad Nabiul.

**Brazil:** Dias Raul, Izar Maria Cristina, Saporito Wladimir, Cesena Fernando, Saraiva Jose, Maia Lilia, Ardito Wilma, Ayoub Jose, Manenti Euler, Fontana Hugo, Moraes João, Hissa Miguel, Pedrosa Hermelinda, Antunes Daniela, Lisboa Hugo, Oigman Willie, Silva Antonio, Lima Sonia, Isaia Carlos, Giraldez Viviane, Rossi Fabio.

**Colombia:** Puerta Carlos Felipe, Rincon Nelson Andres, Quintero Stella, Fandiño Alberto, Abaunza Leonidas, Jacome Andres Mauricio, Lenis Claudia Patricia, Lossa Claudia, Holguin Diego, Orozco Liliana, García Olga Lucia, Balaguera Jose Francisco, Cohen Luz Helena, Sotomayor Aristides, Jaramillo Carlos Francisco, Murillo Nelson, Lievano Manuel, Vesga Boris, Quintero Adalberto, Pantoja Dolly, Chacon Maria del Pilar, Lujan Dilcia Maria, Yepes Carlos Augusto, Lopez Claudia Tatiana, Yupanqui Hernan, Botero José Fernando, Yepes Emerson, Ibarra Jaime, Rueda Javier Enrique, Florez Jose Luis, Molina Dora, Coronel Julian.

**India:** Kaul Upendra, Krishnamurthy Deepak, Chandra Subash, Reddy Y Vijaya Chandra, Chopda Manoj, Sinha Sudhir Chandra, Kesavamurthy C B, Khan Idris Ahmed, Dave Tarun, Kawthekar Girish, Chopra Vijay Kumar, Kothari Dipesh, Kumar Ravi, Singh Kiran Pal, Ballani Piya, Modi K D, Sanyal Debmalaya, Prabhu Mukhyaprana, Nagendar Jakka, Sharma Surender Kumar, Patnala Sreedevi, Shah Jayesh, Shah Siddharth, Roy Amitabha, Jain Gaurav, Sanghvi M D, Mutha Abhay, Dani Praveen, Madhavan R, Gupta JB, Bhattacharyya Paramartha, Somani Vinod, Rohatgi Gyanendra Mohan, Sanghvi Snehal, Vasudevan Sujit, Verma Sachin, Ganga Kiran, Gupta Rajeev, Verma Sanjay, Gangakhed Satish Kumar, Beswal Gaurav, J Ramdas, Mallikarjuna Rao KV, Vadavi Arun, Marya Rajesh, Mathew Joy, Rau Ram Mohan, Manu Sharma, Sonawane Sandeep, Ravindra Sethiya, Gandhi Sanjay, Mathew S, Kalanithi A, Shah Ashok, Mahajan Sanjay, Pathak HS, Julka Sandeep, Gupta Sanjay, Nagre Santosh, Dhand Sunil, Bannerjee Abhijeet, T Madana Mohan, Haldar Susovan, George Abraham P, Agarwal Sanjay, Gheewala Nalin, Jain Pradeep Kumar, Tewari Ajoy K, Baldawa Vishnu, Kumar JS, Khanna Monica, Mathai Johnson, Rao Sanjay, Poddar Mahesh, Mane Rajendra, Sethia Ashok, Rao Visweswar, Perumal Nalla, Kumar J.Aman, Kongara Srikanth, Hari K, Tongaonkar Aniruddha, Gupta Sanjeev, Marda Mahesh, Jain Sunil, Sethi Kamal Kumar, Razzak MA, Rao Dayasagar, Dhar Pramod Kumar, Shah Devang.

**Israel:** Orlovsky Sophia, Chornia Larisa, Ciuraru George, Feldman Arie, Doctor Ruth, Eliyahu Vered, Radzinski Irena, Pomeranz Avishalom, Golzman Boris, Geva Adi.

**Republic of Korea:** Sung-Il Sohn, Sung-Hee Choi, Yong-Jin Kim, SeungJin Oh, Jin-Ho Shin, Bo-Hyun Kim, Woo-Keun Seo, Jae-Kwan Cha, Kyoung-Im Cho, Hye-Soon Kim, Jin-Won Kim, Sang-Chol Lee, Shin-Jae Kim, Sang Yong Kim, Jung-Rae Cho, JungSun Kim, Kyung-Mook Choi, SoonHee Lee, Kang-Wook Lee.

**Kuwait:** Zubaid Mohammed, Farrag Ebrahim, Saad Hisham, Abd Al Monem Amro, Hasan Ebrahim, Mekhaeil Medhat, Lashin Ebrahim.

**Lebanon:** Mouawad Walid, Keshishian Sahak, Amm Mireille, Andari Emile, Zind Romel, Ballout Hajar, Mohamad Malek, Moukheiber Sami, Abdel Massih Tony, Azar Rabih.

**Mexico:** César Gonzalo Calvo Vargas, Edmundo Bayram Ilamas, Esperanza Martinez Abundis, Gerardo Andres Baez Vargas, Pedro Mendoza Martinez, Rodrigo Navarrete Valencia, Bernardo Emilio Valenzuela Salazar, Francisco Javier Robledo Gutierrez, Alfredo Nacoud Askar, Carlos Alberto Aguilar Salinas, Sergio Zuñiga Guajardo, Maria Elena Cedano Limon, Roberto Bejarano Rodriguez, Lirio de Maria Delgado Garcia, Juan Carlos Villanueva Arias, Lucia Alejandra Castillo Vigna, José Gerardo Gonzalez Gonzalez, Martha Leticia López Velazco.

**Oman:** Khalid Al Rasahdi, Khalid Al Wali, Mustafa Al Hinai, Ali Mamari, Omayma Elshafaie, Mehar Ali.

**Russia:** Karpov Yuri, Ezhov Marat, Khaisheva Larisa, Lyamina Nadezhda, Viktorova Inna, Kosmacheva Elena, Khasanov Niyaz, Libis Roman, Tretyakova Tatyana, Koziolova Natalya, Eliseeva Liudmila, Napalkov Dmitriy, Karetnikova Victoriya, Boytsov Sergey.

**Saudi Arabia:** Shukri Al Sail, Osama El Khateeb, Maryam Al Qaseer, Rashid Al Jawair, Eman Ashgar, Abdulwahab Bawahab, Hassan El Sayed, Mohammed Balgith.

**South Africa:** Blom Dirk, Amod Aslam, Chelin Neville, Coetzee Kathleen, Corbett Clive, Fouche Leon, Fourie Nyda, Govind Uttam, Joshi Shaifali, Kapp Cornelia, Kotze Hester, Makan Hemant, Mahomed Akbar, Ngcakani Nomangesi Judith, Padayachee Trevenesan, Raal Frederick, Seedat Saadiya, Snyman Hans, Trokis Julien.

**United Arab Emirates:** Azan Binbrek, Ali Aslani, Yasser El Henawy, Arshad Rasheed, Mouna Mohamdioua Boukhanera, Guevarra Daffodills, Kais Ismail Mrabet, Fahad Baslaib, Vani Krishna, Jaison T M, Nooshin Bazargani, Hashemi Pour, Katherine Rose, Lalit Maheshwari.

**Turkey:** Kayıkçıođlu Meral, Akbulut Mehmet, Arık Osman Ziya, Ural Dilek, Yılmaz Remzi, Öner Abdülvedat, Karahan Burhan, Örem Cihan, Temizhan Ahmet, Erdođu İsmail, Kemalođlu Melek Didem, Kıрма Cevat, Altunkeser Bülent Behlül, Gökçe Mustafa, Şabanođlu Cengiz, Aksoy Mehmet, Şahin Mahmut, Taştan Ahmet, Keser Ahmet, Köseođlu Cemal, Tunçer Eşref, Demir Erdem, Yüksel Gülhan, Altın Cihan, Kanadaşı Mehmet, Aksakal Aytekin, Ođuz Aytekin, Arkan Tuđba, Bilgi Mustafa, Kamberođlu Seyfi, Gülsün Mehmet Sıdık, Çakır Murat, Şahin Nedim, Sakar Mehmet, Akyer Erdal, Karaca Elyesa, Eralp Ahmet Bülent, Bozkuş Rifat, Develiođlu Hülya, Ocak Serin Sibel, Özer Necla, Şeker Taner, Koç Mevlüt, Sađ Saim, Çabuk Ali Kemal, Üstün Emel, Şirin Yusuf, Uçar Ender, Ergene Asım Oktay, Dursun Hüseyin, Aliođlu Emin, Kilci Hakan, Ertem Ahmet Göktuđ, Aytekin Saide, Yeter Ekrem, Şahin Alparslan, Bayram Fahri, Özentürk Cihan, Dal Kürşat, Çiçek Sümeyye, Dođan Cemile Elvin, Yiđit Sevil, Mazi Emrah Erkan, Kaya Emine, Şengün Ahmet, Okur Hasan Caner, Terziođlu Nevin, Aktürk Müjde Yeşim, Şahin İbrahim, Acar Bilal, Atay Ahmet Engin, Yılmaz Ozan, İhsan Habibođlu, Demirtunç Refik, Çetin Nezhil Abdullah, Bambul Nail, Cengiz Mahir, Karakaş Mustafa Serkan, Özdemir Zeynep Tuđba, Kayıkçıođlu Sezgi.

**Ukraine:** Olga Garkavenko, Lilia Kisilevych, Vadym Romanov, Olena Matova, Mariia Egorova, Inna Kovaleva, Evgen Andreev, Oleksandr Galetsky, Iryna Chulaevska, Iryna Sichkaruk, Olena Chirva, Pavlo Kaplan, Oleg Leshchuk, Olga Verbovska, Olena Karlinska, Ivanna Antoniuk-Scheglova, Hanna Havalko, Viktoria Potaskalova, Olena Karmazina, Oksana Onoprienko, Tetiana Ostashevskaya, Liudmyla Petrenko, Viktoria Bugeruk, Iryna Zaplatynska, Liudmyla Mazurok.

**Supplementary Table 2. Physician characteristics, by country, overall and region (Middle-East and Latin-America)**

|                                       | Oman<br>N=6 | Lebanon<br>N=10 | Saudi Arabia<br>N=8 | United Arab Emirates<br>N=14 | Israel<br>N=10 | Kuwait<br>N=7 | Turkey<br>N=80 | Argentina<br>N=10 | Brazil<br>N=21 | Colombia<br>N=32 | Mexico<br>N=18 | Algeria<br>N=49 | South Korea<br>N=19 | South Africa<br>N=19 | Russia<br>N=14 | Bangladesh<br>N=20 | India<br>N=90 | Ukraine<br>N=25 | Total<br>N=452 | Middle-East<br>N=135 | LATAM<br>N=81 |
|---------------------------------------|-------------|-----------------|---------------------|------------------------------|----------------|---------------|----------------|-------------------|----------------|------------------|----------------|-----------------|---------------------|----------------------|----------------|--------------------|---------------|-----------------|----------------|----------------------|---------------|
| Age (years), mean (SD)                | 48.2 (6.8)  | 50.8 (9.2)      | 51.0 (8.7)          | 47.9 (12.3)                  | 52.2 (9.8)     | 52.4 (2.2)    | 43.5 (8.5)     | 56.0 (6.7)        | 53.6 (9.2)     | 48.8 (8.1)       | 48.3 (10.9)    | 50.5 (7.0)      | 45.8 (3.8)          | 50.6 (8.4)           | 50.9 (8.2)     | 46.7 (5.3)         | 52.4 (9.9)    | 44.4 (10.0)     | 49.0 (9.3)     | 46.3 (9.4)           | 50.9 (9.2)    |
| Men, n (%)                            | 5 (83.3)    | 8 (80.0)        | 6 (75.0)            | 9 (64.3)                     | 4 (40.0)       | 7 (100.0)     | 61 (76.3)      | 9 (90.0)          | 14 (66.7)      | 21 (65.6)        | 13 (72.2)      | 21 (42.9)       | 16 (84.2)           | 12 (63.2)            | 6 (42.9)       | 19 (95.0)          | 87 (96.7)     | 5 (20.0)        | 323 (71.5)     | 100 (74.1)           | 57 (70.4)     |
| Medical specialty, n (%)              |             |                 |                     |                              |                |               |                |                   |                |                  |                |                 |                     |                      |                |                    |               |                 |                |                      |               |
| General practitioner/family physician | 1 (16.7)    | 1 (10.0)        | 0                   | 5 (35.7)                     | 6 (60.0)       | 0             | 0              | 0                 | 1 (4.8)        | 12 (37.5)        | 9 (50.0)       | 5 (10.2)        | 0                   | 11 (57.9)            | 0              | 4 (20.0)           | 6 (6.7)       | 0               | 61 (13.5)      | 13 (9.6)             | 22 (27.2)     |
| Cardiologist                          | 1 (16.7)    | 6 (60.0)        | 6 (75.0)            | 9 (64.3)                     | 0              | 5 (71.4)      | 39 (48.8)      | 5 (50.0)          | 13 (61.9)      | 7 (21.9)         | 2 (11.1)       | 30 (61.2)       | 9 (47.4)            | 1 (5.3)              | 10 (71.4)      | 7 (35.0)           | 18 (20.0)     | 15 (60.0)       | 183 (40.5)     | 66 (48.9)            | 27 (33.3)     |
| Lipidologist                          | 2 (33.3)    | 0               | 0                   | 0                            | 0              | 0             | 0              | 3 (30.0)          | 0              | 1 (3.1)          | 1 (5.6)        | 0               | 0                   | 1 (5.3)              | 0              | 0                  | 0             | 0               | 8 (1.8)        | 2 (1.5)              | 5 (6.2)       |
| Endocrinologist                       | 2 (33.3)    | 3 (30.0)        | 2 (25.0)            | 0                            | 1 (10.0)       | 0             | 4 (5.0)        | 0                 | 4 (19.0)       | 6 (18.8)         | 3 (16.7)       | 4 (8.2)         | 6 (31.6)            | 2 (10.5)             | 0              | 5 (25.0)           | 11 (12.2)     | 0               | 53 (11.7)      | 12 (8.9)             | 13 (16.0)     |
| Internal medicine specialist          | 0           | 0               | 0                   | 0                            | 2 (20.0)       | 2 (28.6)      | 36 (45.0)      | 1 (10.0)          | 0              | 5 (15.6)         | 3 (16.7)       | 9 (18.4)        | 0                   | 1 (5.3)              | 3 (21.4)       | 3 (15.0)           | 41 (45.6)     | 9 (36.0)        | 115 (25.4)     | 40 (29.6)            | 9 (11.1)      |
| Other                                 | 0           | 0               | 0                   | 0                            | 1 (10.0)       | 0             | 0              | 0                 | 2 (9.5)        | 0                | 0              | 0               | 4 (21.1)            | 2 (10.5)             | 0              | 1 (5.0)            | 9 (10.0)      | 1 (4.0)         | 20 (4.4)       | 1 (0.7)              | 2 (2.5)       |
| Several specialties                   | 0           | 0               | 0                   | 0                            | 0              | 0             | 1 (1.3)        | 1 (10.0)          | 1 (4.8)        | 1 (3.1)          | 0              | 1 (2.0)         | 0                   | 1 (5.3)              | 1 (7.1)        | 0                  | 5 (5.6)       | 0               | 12 (2.7)       | 1 (0.7)              | 3 (3.7)       |
| Years of practice (years), mean (SD)  | 21.3 (4.7)  | 19.8 (7.5)      | 21.5 (9.1)          | 20.0 (11.0)                  | 24.3 (11.9)    | 29.0 (2.9)    | 17.9 (8.7)     | 31.6 (6.7)        | 28.7 (9.7)     | 21.0 (8.7)       | 21.9 (9.9)     | 24.3 (7.1)      | 20.9 (4.2)          | 22.9 (8.3)           | 26.9 (7.8)     | 18.6 (7.0)         | 23.6 (10.5)   | 21.4 (8.7)      | 22.3 (9.2)     | 19.6 (9.2)           | 24.5 (9.8)    |
| Type of practice <sup>a</sup> , n (%) |             |                 |                     |                              |                |               |                |                   |                |                  |                |                 |                     |                      |                |                    |               |                 |                |                      |               |
| Public hospital                       | 6 (100.0)   | 4 (40.0)        | 8 (100.0)           | 6 (42.9)                     | 1 (10.0)       | 7 (100.0)     | 68 (85.0)      | 1 (10.0)          | 11 (52.4)      | 2 (6.3)          | 5 (27.8)       | 33 (67.3)       | 18 (94.7)           | 3 (15.8)             | 13 (92.9)      | 9 (45.0)           | 16 (17.8)     | 25 (100.0)      | 236 (52.2)     | 100 (74.1)           | 19 (23.5)     |
| Private hospital                      | 1 (16.7)    | 7 (70.0)        | 0                   | 8 (57.1)                     | 1 (10.0)       | 1 (14.3)      | 15 (18.8)      | 9 (90.0)          | 14 (66.7)      | 19 (59.4)        | 11 (61.1)      | 5 (10.2)        | 1 (5.3)             | 6 (31.6)             | 1 (7.1)        | 11 (55.0)          | 81 (90.0)     | 0               | 191 (42.3)     | 33 (24.4)            | 53 (65.4)     |
| Practice/Office                       | 0           | 7 (70.0)        | 0                   | 0                            | 8 (80.0)       | 0             | 2 (2.5)        | 4 (40.0)          | 3 (14.3)       | 17 (53.1)        | 6 (33.3)       | 15 (30.6)       | 0                   | 11 (57.9)            | 1 (7.1)        | 4 (20.0)           | 10 (11.1)     | 0               | 88 (19.5)      | 17 (12.6)            | 30 (37.0)     |
| Urban                                 | 6 (100.0)   | 8 (80.0)        | 6 (75.0)            | 14 (100.0)                   | 10 (100.0)     | 7 (100.0)     | 65 (81.3)      | 10 (100.0)        | 19 (90.5)      | 30 (93.8)        | 17 (94.4)      | 42 (85.7)       | 18 (94.7)           | 15 (78.9)            | 14 (100.0)     | 14 (70.0)          | 66 (73.3)     | 24 (96.0)       | 385 (85.2)     | 116 (85.9)           | 76 (93.8)     |
| Rural                                 | 0           | 0               | 0                   | 0                            | 0              | 0             | 3 (3.8)        | 0                 | 0              | 0                | 0              | 0               | 0                   | 2 (10.5)             | 0              | 0                  | 1 (1.1)       | 0               | 6 (1.3)        | 3 (2.2)              | 0             |
| Suburban area                         | 0           | 2 (20.0)        | 2 (25.0)            | 0                            | 0              | 0             | 12 (15.0)      | 0                 | 2 (9.5)        | 2 (6.3)          | 1 (5.6)        | 7 (14.3)        | 1 (5.3)             | 2 (10.5)             | 0 (0.0)        | 6 (30.0)           | 23 (25.6)     | 1 (4.0)         | 61 (13.5)      | 16 (11.9)            | 5 (6.2)       |
| Patients consulted per day, mean (SD) | 27.7 (14.2) | 26.4 (10.8)     | 22.1 (12.6)         | 23.9 (11.1)                  | 30.1 (12.6)    | 21.4 (3.8)    | 50.0 (27.1)    | 15.0 (6.3)        | 18.3 (11.5)    | 21.7 (10.4)      | 14.7 (6.6)     | 20.7 (9.6)      | 62.4 (17.2)         | 21.6 (10.7)          | 9.0 (5.0)      | 36.5 (14.4)        | 43.5 (22.2)   | 16.9 (13.6)     | 32.2 (22.6)    | 39.9 (25.1)          | 18.4 (9.9)    |

|                                                    | Oman<br>N=6    | Lebanon<br>N=10 | Saudi Arabia<br>N=8 | United Arab Emirates<br>N=14 | Israel<br>N=10 | Kuwait<br>N=7 | Turkey<br>N=80 | Argentina<br>N=10 | Brazil<br>N=21 | Colombia<br>N=32 | Mexico<br>N=18 | Algeria<br>N=49 | South Korea<br>N=19 | South Africa<br>N=19 | Russia<br>N=14 | Bangladesh<br>N=20 | India<br>N=90  | Ukraine<br>N=25 | Total<br>N=452 | Middle-East<br>N=135 | LATAM<br>N=81 |
|----------------------------------------------------|----------------|-----------------|---------------------|------------------------------|----------------|---------------|----------------|-------------------|----------------|------------------|----------------|-----------------|---------------------|----------------------|----------------|--------------------|----------------|-----------------|----------------|----------------------|---------------|
| With dyslipidaemia and/or on LLT                   | 20.4<br>(17.3) | 12.3<br>(5.3)   | 14.9<br>(6.7)       | 12.4<br>(8.7)                | 9.2<br>(7.6)   | 14.9<br>(2.9) | 11.3<br>(7.0)  | 8.3<br>(3.1)      | 10.0<br>(8.3)  | 9.5<br>(5.3)     | 5.4<br>(2.6)   | 9.5<br>(6.3)    | 29.2<br>(14.0)      | 6.5<br>(3.4)         | 6.0<br>(4.2)   | 16.4 (9.9)         | 17.3<br>(10.8) | 10.8 (8.1)      | 12.4<br>(9.5)  | 12.2 (7.8)           | 8.6 (5.9)     |
| Adherence to guidelines for lipid disorders, n (%) | 5<br>(83.3)    | 10<br>(100.0)   | 8<br>(100.0)        | 14<br>(100.0)                | 10<br>(100.0)  | 7<br>(100.0)  | 76<br>(95.0)   | 10<br>(100.0)     | 21<br>(100.0)  | 31<br>(96.9)     | 16<br>(88.9)   | 48<br>(100.0)   | 19<br>(100.0)       | 19<br>(100.0)        | 14<br>(100.0)  | 18 (90.0)          | 82<br>(91.1)   | 25<br>(100.0)   | 433<br>(96.0)  | 130<br>(96.3)        | 78 (96.3)     |
| ESC/EAS <sup>2</sup>                               | 4<br>(80.0)    | 7<br>(70.0)     | 5<br>(62.5)         | 10<br>(71.4)                 | 8<br>(80.0)    | 6<br>(85.7)   | 73<br>(96.1)   | 8 (80.0)          | 6<br>(28.6)    | 9 (29.0)         | 7<br>(43.8)    | 47<br>(97.9)    | 6<br>(31.6)         | 11<br>(57.9)         | 13<br>(92.9)   | 6 (33.3)           | 28<br>(34.1)   | 22 (88.0)       | 276<br>(63.7)  | 113<br>(86.9)        | 30 (38.5)     |
| ACC/AHA <sup>3</sup>                               | 3<br>(60.0)    | 6<br>(60.0)     | 4<br>(50.0)         | 11<br>(78.6)                 | 1<br>(10.0)    | 1<br>(14.3)   | 41<br>(53.9)   | 5 (50.0)          | 11<br>(52.4)   | 23<br>(74.2)     | 9<br>(56.3)    | 13<br>(27.1)    | 13<br>(68.4)        | 6<br>(31.6)          | 5<br>(35.7)    | 15 (83.3)          | 57<br>(69.5)   | 7 (28.0)        | 231<br>(53.3)  | 67 (51.5)            | 48 (61.5)     |
| Other international guidelines                     | 1<br>(20.0)    | 0               | 1<br>(12.5)         | 0                            | 0              | 0             | 3<br>(3.9)     | 2 (20.0)          | 1<br>(4.8)     | 0                | 1<br>(6.3)     | 3<br>(6.3)      | 3<br>(15.8)         | 1<br>(5.3)           | 0              | 0                  | 6 (7.3)        | 1 (4.0)         | 23 (5.3)       | 5 (3.8)              | 4 (5.1)       |
| Local/national guidelines                          | 0              | 1<br>(10.0)     | 0                   | 0                            | 2<br>(20.0)    | 0             | 6<br>(7.9)     | 3 (30.0)          | 11<br>(52.4)   | 6 (19.4)         | 0              | 0               | 4<br>(21.1)         | 8<br>(42.1)          | 14<br>(100.0)  | 1 (5.6)            | 4 (4.9)        | 12 (48.0)       | 72<br>(16.6)   | 9 (6.9)              | 20 (25.6)     |
| Definition of statin intolerance, n (%)            |                |                 |                     |                              |                |               |                |                   |                |                  |                |                 |                     |                      |                |                    |                |                 |                |                      |               |
| Intolerance to 1 statin                            | 1<br>(16.7)    | 1<br>(10.0)     | 2<br>(25.0)         | 5<br>(35.7)                  | 0              | 0             | 27<br>(33.8)   | 1<br>(10.0)       | 5<br>(23.8)    | 9<br>(29.0)      | 8<br>(44.4)    | 11<br>(22.4)    | 10<br>(52.6)        | 3<br>(15.8)          | 1<br>(7.1)     | 6<br>(30.0)        | 31<br>(34.4)   | 4<br>(16.0)     | 125<br>(27.7)  | 36<br>(26.7)         | 23<br>(28.8)  |
| Intolerance to 2 statins                           | 4<br>(66.7)    | 4<br>(40.0)     | 5<br>(62.5)         | 7<br>(50.0)                  | 4<br>(40.0)    | 6<br>(85.7)   | 37<br>(46.3)   | 3<br>(30.0)       | 10<br>(47.6)   | 15<br>(48.4)     | 7<br>(38.9)    | 20<br>(40.8)    | 7<br>(36.8)         | 9<br>(47.4)          | 8<br>(57.1)    | 12<br>(60.0)       | 50<br>(55.6)   | 2<br>(8.0)      | 210<br>(46.6)  | 67<br>(49.6)         | 35<br>(43.8)  |
| Intolerance to ≥3 statins                          | 1<br>(16.7)    | 5<br>(50.0)     | 1<br>(12.5)         | 2<br>(14.3)                  | 6<br>(60.0)    | 1<br>(14.3)   | 16<br>(20.0)   | 6<br>(60.0)       | 6<br>(28.6)    | 7<br>(22.6)      | 3<br>(16.7)    | 18<br>(36.7)    | 2<br>(10.5)         | 7<br>(36.8)          | 5<br>(35.7)    | 2<br>(10.0)        | 9<br>(10.0)    | 19<br>(76.0)    | 116<br>(25.7)  | 32<br>(23.7)         | 22<br>(27.5)  |

ACC, American College of Cardiology; EAS, European Atherosclerosis Society; ESC, European Society of Cardiology; LLT, lipid-lowering therapy; SD, standard deviation;

<sup>a</sup> Categories are not mutually exclusive.

The most common specializations were cardiology (40.5%), internal medicine (25.4%), 13.5% general/family practice, and endocrinology (11.7%). Overall, 52.2% were in public hospitals, 42.3% in private hospitals, and 19.5% in offices; 85.2% of practices were urban.



**Supplementary Table 3. Characteristics of the study population, by cardiovascular risk level (calculated using SCORE<sup>1</sup>)**

| Variable                                         | Total<br>(n=9049) | Risk level   |                     |                  |                    |                                         |
|--------------------------------------------------|-------------------|--------------|---------------------|------------------|--------------------|-----------------------------------------|
|                                                  |                   | Low (n=70)   | Moderate<br>(n=411) | High (n=2621)    | Very high (n=4842) | Not assessable <sup>a</sup><br>(n=1105) |
| Age (years), mean (SD)                           | 60.2 (11.7)       | 37.6 (5.7)   | 51.8 (10.3)         | 57.5 (11.3)      | 63.3 (10.7)        | 57.6 (12.4)                             |
| Men, n (%)                                       | 4975 (55.0)       | 8 (11.4)     | 171 (41.6)          | 1152 (44.0)      | 3136 (64.8)        | 508 (46.0)                              |
| Presenting characteristics                       |                   |              |                     |                  |                    |                                         |
| BMI, N                                           | 8876              | 70           | 401                 | 2589             | 4740               | 1076                                    |
| kg/m <sup>2</sup> , Mean (SD)                    | 28.4 (5.2)        | 26.8 (4.5)   | 27.6 (4.9)          | 28.8 (5.5)       | 28.4 (5.0)         | 27.9 (5.1)                              |
| 25 to <30 kg/m <sup>2</sup> , n (%)              | 3750 (42.2)       | 25 (35.7)    | 181 (45.1)          | 1117 (43.1)      | 1954 (41.2)        | 473 (44.0)                              |
| ≥30 kg/m <sup>2</sup> , n (%)                    | 2851 (32.1)       | 16 (22.9)    | 104 (25.9)          | 874 (33.8)       | 1570 (33.1)        | 287 (26.7)                              |
| Waist circumference N                            | 7752              | 61           | 343                 | 2253             | 4150               | 945                                     |
| Mean (SD), cm                                    | 96.4 (15.7)       | 89.4 (17.4)  | 93.5 (14.2)         | 96.5 (16.4)      | 97.8 (14.4)        | 91.8 (18.7)                             |
| ≥80 cm in women and ≥94 cm in men, n (%)         | 5776 (74.5)       | 43/61 (70.5) | 239 (69.7)          | 1781 (79.1)      | 3075 (74.1)        | 638 (67.5)                              |
| Metabolic syndrome (ATP III), n (%)              | 4127/8963 (46.0)  | 25/70 (35.7) | 123/407 (30.2)      | 1312/2598 (50.5) | 2349/4798 (49.0)   | 318/1090 (29.2)                         |
| Regular alcohol consumption <sup>b</sup> , n (%) | 858 (9.5)         | 3 (4.3)      | 51 (12.4)           | 224 (8.5)        | 492 (10.2)         | 88 (8.0)                                |
| Current smoker <sup>c</sup> , n or n/N (%)       | 1124/9048 (12.4)  | 6 (8.6)      | 44 (10.7)           | 215 (8.2)        | 756/4841 (15.6)    | 103 (9.3)                               |
| Physical inactivity <sup>e</sup> , n (%)         | 4454 (49.2)       | 38 (54.3)    | 189 (46.0)          | 1235 (47.1)      | 2501 (51.7)        | 491 (44.4)                              |
| Heart rate, N                                    | 8829              | 70           | 410                 | 2537             | 4723               | 1089                                    |
| Beats/min, mean (SD)                             | 74.8 (10.1)       | 76.3 (8.8)   | 74.5 (10.0)         | 77.0 (8.9)       | 73.6 (10.7)        | 74.8 (9.1)                              |
| Arcus cornealis <sup>e</sup> , n (%)             | 467 (5.2)         | 0            | 8 (1.9)             | 112 (4.3)        | 313 (6.5)          | 34 (3.1)                                |
| Tendinous xanthomata <sup>e</sup> , n (%)        | 202 (2.2)         | 1 (1.4)      | 1 (0.2)             | 45 (1.7)         | 144 (3.0)          | 11 (1.0)                                |
| Risk factor, n (%)                               |                   |              |                     |                  |                    |                                         |
| SBP ≥140 mmHg and/or DBP ≥90 mmHg                | 3069/9013 (34.1)  | 15/70 (21.4) | 85/411 (20.7)       | 884/2609 (33.9)  | 1734/4827 (35.9)   | 351/1096 (32.0)                         |
| Diabetes mellitus (type 1 or 2)                  | 4916/9046 (54.3)  | 0            | 0                   | 2289 (87.3)      | 2627/4839 (54.3)   | 0                                       |

| Variable                                                     | Total<br>(n=9049) | Risk level    |                     |                  |                    |                                         |
|--------------------------------------------------------------|-------------------|---------------|---------------------|------------------|--------------------|-----------------------------------------|
|                                                              |                   | Low (n=70)    | Moderate<br>(n=411) | High (n=2621)    | Very high (n=4842) | Not assessable <sup>a</sup><br>(n=1105) |
| Diabetes mellitus type 2 (in overall population), n/N (%)    | 4704/9043 (52.0)  | 0             | 0                   | 2186 (83.4)      | 2518/4837 (52.1)   | 0                                       |
| Dyslipidaemia (diagnosis or history) (physician defined)     | 7874/9032 (87.2)  | 64 (91.4)     | 388 (94.4)          | 2408/2617 (92.0) | 4063/4831 (84.1)   | 951/1103 (86.2)                         |
| Hypertension (diagnosed/history of)                          | 6473 (71.5)       | 30 (42.9)     | 190 (46.2)          | 1696 (64.7)      | 3876 (80.0)        | 681 (61.6)                              |
| Previous atherosclerotic CVD                                 | 3782/9019 (41.9)  | 0             | 0                   | 0                | 3782/4838 (78.2)   | 0                                       |
| Family history of CAD <sup>f</sup>                           | 2230 (24.6)       | 11 (15.7)     | 118 (28.7)          | 524 (20.0)       | 1329 (27.4)        | 248 (22.4)                              |
| Familial hypercholesterolaemia <sup>g</sup>                  | 211/3249 (6.5)    | 0             | 0                   | 69/949 (7.3)     | 142/1816 (7.8)     | 0                                       |
| Medical history, n (%)                                       |                   |               |                     |                  |                    |                                         |
| ACS (documented)                                             | 3320/9048 (36.7)  | 0             | 0                   | 0                | 3320 (68.6)        | 0                                       |
| Stroke (any)                                                 | 567 (6.3)         | 0             | 0                   | 0                | 567 (11.7)         | 0                                       |
| Peripheral artery disease                                    | 430 (4.8)         | 0             | 0                   | 0                | 430/4840 (8.9)     | 0                                       |
| Congestive heart failure                                     | 796 (8.8)         | 1 (1.4)       | 7 (1.7)             | 41 (1.6)         | 717 (14.8)         | 30 (2.7)                                |
| Chronic kidney disease (GFR <60 mL/min/1.73 m <sup>2</sup> ) | 922 (10.2)        | 1 (1.4)       | 12 (2.9)            | 61 (2.3)         | 821 (17.0)         | 27 (2.4)                                |
| Neurocognitive disorder                                      | 291 (3.2)         | 0             | 10 (2.4)            | 44 (1.7)         | 224 (4.6)          | 13 (1.2)                                |
| Chronic obstructive pulmonary disease, n (%)                 | 319 (3.5)         | 0             | 7 (1.7)             | 50 (1.9)         | 239 (4.9)          | 23 (2.1)                                |
| Cancer                                                       | 298 (3.3)         | 0             | 11 (2.7)            | 71 (2.7)         | 187 (3.9)          | 29 (2.6)                                |
| Time since diagnosis of dyslipidaemia (years), median (IQR)  | 4.0 (2.0;8.0)     | 1.0 (1.0;5.0) | 3.0 (1.0;5.5)       | 4.0 (2.0;7.0)    | 5.0 (2.0;10.0)     | 4.0 (2.0;7.0)                           |
| Cause of dyslipidaemia, n (%)                                |                   |               |                     |                  |                    |                                         |
| Secondary <sup>h</sup>                                       | 5193/9031 (57.5)  | 39 (55.7)     | 188 (45.7)          | 1675/2619 (64.0) | 2726/4826 (56.5)   | 565 (51.1)                              |
| Primary/FH <sup>i</sup>                                      | 1175/9031 (13.0)  | 9 (12.9)      | 100 (24.3)          | 334/2619 (12.8)  | 573/4826 (11.9)    | 159 (14.4)                              |

| Variable                                          | Total<br>(n=9049) | Risk level        |                     |                   |                    |                                         |
|---------------------------------------------------|-------------------|-------------------|---------------------|-------------------|--------------------|-----------------------------------------|
|                                                   |                   | Low (n=70)        | Moderate<br>(n=411) | High (n=2621)     | Very high (n=4842) | Not assessable <sup>a</sup><br>(n=1105) |
| Lipid values at enrolment                         |                   |                   |                     |                   |                    |                                         |
| LDL-C, mmol/L (n=9049)                            | 2.6 (1.3)         | 3.1 (1.4)         | 3.1 (1.5)           | 2.7 (1.3)         | 2.4 (1.2)          | 3.0 (1.3)                               |
| Total cholesterol, mmol/L<br>(n=8807)             | 4.5 (1.2)         | 5.2 (1.6)         | 4.9 (1.1)           | 4.6 (1.2)         | 4.3 (1.2)          | 4.9 (1.2)                               |
| HDL-C, mmol/L (n=8768)                            | 1.2 (0.4)         | 1.2 (0.3)         | 1.3 (0.4)           | 1.2 (0.4)         | 1.2 (0.4)          | 1.3 (0.4)                               |
| Triglycerides, mmol/L<br>(n=8827) median (IQR)    | 1.5 (1.1;2.1)     | 1.8 (1.3;2.4)     | 1.5 (1.2;2.1)       | 1.6 (1.2;2.2)     | 1.5 (1.1;2.0)      | 1.5 (1.1;2.1)                           |
| Mixed dyslipidaemia <sup>i</sup> , n/N (%)        | 2136/7695 (27.8)  | NA                | 91/405 (22.5)       | 661/2564 (25.8)   | 1384/4726 (29.3)   | NA                                      |
| Fasting glucose, mmol/L<br>(n=5734)               | 8.4 (12.1)        | 5.1 (1.1)         | 6.6 (7.6)           | 9.2 (14.2)        | 8.6 (11.9)         | 6.6 (7.7)                               |
| Serum creatinine, µmol/L<br>(n=5875) median (IQR) | 79.6 (64.0; 97.2) | 63.6 (53.0; 79.6) | 70.7 (61.9; 88.4)   | 70.7 (61.9; 88.4) | 81.6 (70.7; 101.7) | 2.5 (61.9; 88.4)                        |

Data presented as n (%), mean (SD), or median (interquartile range).

ACS, acute coronary syndrome; ATP, Adult Treatment Panel; BMI, body mass index; CAD, coronary artery disease; CVD, cardiovascular disease; DBP, diastolic blood pressure; FH, familial hypercholesterolaemia; GFR, glomerular filtration rate; HDL-C, high-density lipoprotein cholesterol; HR, heart rate; HRT, hormone replacement therapy; IQR, interquartile range; LDL-C, low-density lipoprotein cholesterol; NA, not available; SBP, systolic blood pressure; SCORE, Systemic Coronary Risk Estimation; SD, standard deviation.

<sup>a</sup> Patients without a serious pathology classifying them as very high or high cardiovascular risk, and in whom the SCORE could not be calculated due to missing data.

<sup>b</sup> Consumption  $\geq 3$  times a week.

<sup>c</sup> Individuals who smoked tobacco or who quit smoking during past year.

<sup>d</sup> Subject is not regularly involved in moderate (walking/cycling/gardening) or strenuous exercise (jogging/football/vigorous swimming) for  $\geq 4$  hours each week.

<sup>e</sup> Physician defined.

<sup>f</sup> Coronary and/or vascular disease  $< 55$  years of age in male and  $< 60$  years in female first-degree relatives.

<sup>g</sup> Dutch Lipid Clinics criteria: definite or probable.

<sup>h</sup> Excessive intake of alcohol or saturated fats or carbohydrates; medication side-effects; another medical condition such as poorly controlled diabetes mellitus, obesity, medications, obstructive liver disease, kidney disease, multiple myeloma, or hypothyroidism.

<sup>i</sup> Physician defined (with/without genetic test).

<sup>j</sup> Total serum triglycerides  $\geq 1.7$  mmol/L (150 mg/dL) and LDL-C  $>$ target (before starting LLT).

**Supplementary Table 4. Lipid laboratory values, overall and by cardiovascular risk level (calculated using SCORE<sup>1</sup>) at time of first diagnosis, before starting lipid-lowering therapy**

| Variable                 | Total<br>(n=9049) | Risk level       |                     |                  |                       |                                         |
|--------------------------|-------------------|------------------|---------------------|------------------|-----------------------|-----------------------------------------|
|                          |                   | Low<br>(n=70)    | Moderate<br>(n=411) | High<br>(n=2621) | Very high<br>(n=4842) | Not assessable <sup>a</sup><br>(n=1105) |
| LDL-C (N)                | 3249              | 64               | 377                 | 949              | 1816                  | 43                                      |
| Mean (SD),<br>mmol/L     | 3.9 (1.4)         | 4.1 (1.0)        | 4.2 (1.0)           | 4.0 (1.7)        | 3.7 (1.3)             | 4.0 (1.3)                               |
| Total cholesterol<br>(N) | 3380              | 70               | 411                 | 988              | 1906                  | 5                                       |
| Mean (SD),<br>mmol/L     | 6.0 (1.5)         | 6.2 (1.2)        | 6.3 (1.2)           | 6.0 (1.6)        | 5.8 (1.5)             | 6.1 (1.0)                               |
| HDL-C (N)                | 3089              | 67               | 379                 | 913              | 1708                  | 22                                      |
| Mean (SD),<br>mmol/L     | 1.2 (0.4)         | 1.2 (0.5)        | 1.2 (0.4)           | 1.2 (0.4)        | 1.2 (0.4)             | 1.2 (0.5)                               |
| Triglycerides (N)        | 3274              | 66               | 398                 | 970              | 1820                  | 20                                      |
| Median (IQR),<br>mol/L   | 1.9<br>(1.3;2.6)  | 2.0<br>(1.4;2.8) | 1.9 (1.3;2.7)       | 1.9 (1.4;2.7)    | 1.9 (1.3;2.6)         | 2.0 (1.5;2.8)                           |

LDL-C, low-density lipoprotein cholesterol; SD, standard deviation; HDL-C, high-density lipoprotein cholesterol; IQR, interquartile range; SCORE, Systemic Coronary Risk Estimation.

<sup>a</sup> Patients without a serious pathology classifying them as very high or high cardiovascular risk, and in whom the SCORE could not be calculated due to missing data.

**Supplementary Table 5. Selected antithrombotic and other cardiovascular therapies, overall and by cardiovascular risk level**

| Variable, n (%)              | Total<br>(n=9049) | Risk level |                  |               |                       |                                         |
|------------------------------|-------------------|------------|------------------|---------------|-----------------------|-----------------------------------------|
|                              |                   | Low (n=70) | Moderate (n=411) | High (n=2621) | Very high<br>(n=4842) | Not assessable <sup>a</sup><br>(n=1105) |
| Antithrombotic therapy       |                   |            |                  |               |                       |                                         |
| Aspirin                      | 4721 (52.2)       | 8 (11.4)   | 84 (20.4)        | 828 (31.6)    | 3493 (72.1)           | 308 (27.9)                              |
| Other antiplatelet           | 1609 (17.8)       | 4 (5.7)    | 26 (6.3)         | 149 (5.7)     | 1370 (28.3)           | 60 (5.4)                                |
| Oral anticoagulant           | 441 (4.9)         | 0          | 8 (1.9)          | 53 (2.0)      | 348 (7.2)             | 32 (2.9)                                |
| None                         | 3318 (36.7)       | 58 (82.9)  | 298 (72.5)       | 1580 (60.3)   | 664 (13.7)            | 718 (65.0)                              |
| Other cardiovascular therapy |                   |            |                  |               |                       |                                         |
| ACE inhibitor                | 2262 (25.0)       | 5 (7.1)    | 51 (12.4)        | 374 (14.3)    | 1689 (34.9)           | 143 (12.9)                              |
| ARB                          | 3187 (35.2)       | 14 (20.0)  | 101 (24.6)       | 943 (36.0)    | 1813 (37.4)           | 316 (28.6)                              |
| Diuretic                     | 2206 (24.4)       | 9 (12.9)   | 50 (12.2)        | 456 (17.4)    | 1508 (31.1)           | 183 (16.6)                              |
| Beta-blocker                 | 3380 (37.4)       | 11 (15.7)  | 68 (16.5)        | 445 (17.0)    | 2630 (54.3)           | 226 (20.5)                              |
| Calcium channel blocker      | 2198 (24.3)       | 9 (12.9)   | 67 (16.3)        | 495 (18.9)    | 1410 (29.1)           | 217 (19.6)                              |
| Other antihypertensive       | 427 (4.7)         | 1 (1.4)    | 7 (1.7)          | 81 (3.1)      | 297 (6.1)             | 41 (3.7)                                |
| None                         | 1998 (22.1)       | 39 (55.7)  | 200 (48.7)       | 959 (36.6)    | 356 (7.4)             | 444 (40.2)                              |

ACE, angiotensin-converting enzyme; ARB, angiotensin II receptor blocker; SCORE, Systemic Coronary Risk Estimation.

<sup>a</sup> Patients without a serious pathology classifying them as very high or high cardiovascular risk, and in whom the SCORE could not be calculated due to missing data.

**Supplementary Table 6. Change in lipid values after starting LLT (after first diagnosis of dyslipidaemia)**

| Variable                         | Total                | Risk level          |                      |                       |                      |                             |
|----------------------------------|----------------------|---------------------|----------------------|-----------------------|----------------------|-----------------------------|
|                                  |                      | Low                 | Moderate             | High                  | Very high            | Not assessable <sup>a</sup> |
| LDL-C, N                         | 3249                 | 64                  | 377                  | 949                   | 1816                 | 43                          |
| % change from diagnosis          |                      |                     |                      |                       |                      |                             |
| Mean (SD)                        | -26.9 (64.0)         | -19.7 (34.9)        | -27.0 (25.5)         | -27.5 (29.6)          | -27.0 (81.7)         | -23.8 (27.3)                |
| Median (IQR)                     | -33.6 (-48.9; -11.9) | -28.4 (-39.7; -7.9) | -30.6 (-45.1; -13.5) | -31.5 (-47.1; -111.1) | -36.0 (-51.1; -12.2) | -21.2 (-48.7; -0.2)         |
| HDL-C (N)                        | 3035                 | 67                  | 374                  | 892                   | 1681                 | 21                          |
| % change from diagnosis, mean±SD | 6.9 (35.6)           | 5.7 (31.0)          | 5.1 (21.2)           | 5.9 (33.6)            | 7.8 (39.2)           | 12.7 (37.8)                 |

LDL-C, low-density lipoprotein cholesterol; IQR, interquartile range; HDL-C, high-density lipoprotein cholesterol; LLT, lipid-lowering therapy; NA, not available; SD, standard deviation.

<sup>a</sup> Patients without a serious pathology classifying them as very high or high cardiovascular risk, and in whom the SCORE could not be calculated due to missing data.

<sup>b</sup> Total serum triglycerides  $\geq 1.7$  mmol/L (150 mg/dL) and LDL-C > target (before starting LLT).

**Supplementary Table 7. Achievement of target LDL-C levels according to use of high- or low-risk country SCORE chart: sensitivity analysis**

| <b>Risk level</b>         | <b>High risk<sup>a</sup></b> | <b>High or low risk<sup>b</sup></b> |
|---------------------------|------------------------------|-------------------------------------|
| Low                       | 0.8%                         | 1.2%                                |
| Moderate                  | 4.5%                         | 5.7%                                |
| High                      | 29.0%                        | 28.4%                               |
| Very high                 | 53.5%                        | 52.3%                               |
| Non-assessable            | 12.2%                        | 12.3%                               |
| <b>Overall population</b> | <b>39.9%</b>                 | <b>40.6%</b>                        |

LDL-C, low-density lipoprotein cholesterol.

<sup>a</sup> Proportions by risk level, when all countries were considered at high risk (criteria for high-risk SCORE chart used).

<sup>b</sup> Proportions by risk level, when countries with ischaemic heart disease and cerebrovascular disease death rates below 184 deaths per 100,000<sup>4</sup> were considered at low risk (criteria for low-risk SCORE chart used) (i.e. Israel, South Korea, Algeria, Brazil, South Africa, UAE, Colombia, Mexico and Argentina) and all other countries were considered at high cardiovascular risk.

Supplementary Figure 1. Patient flow chart

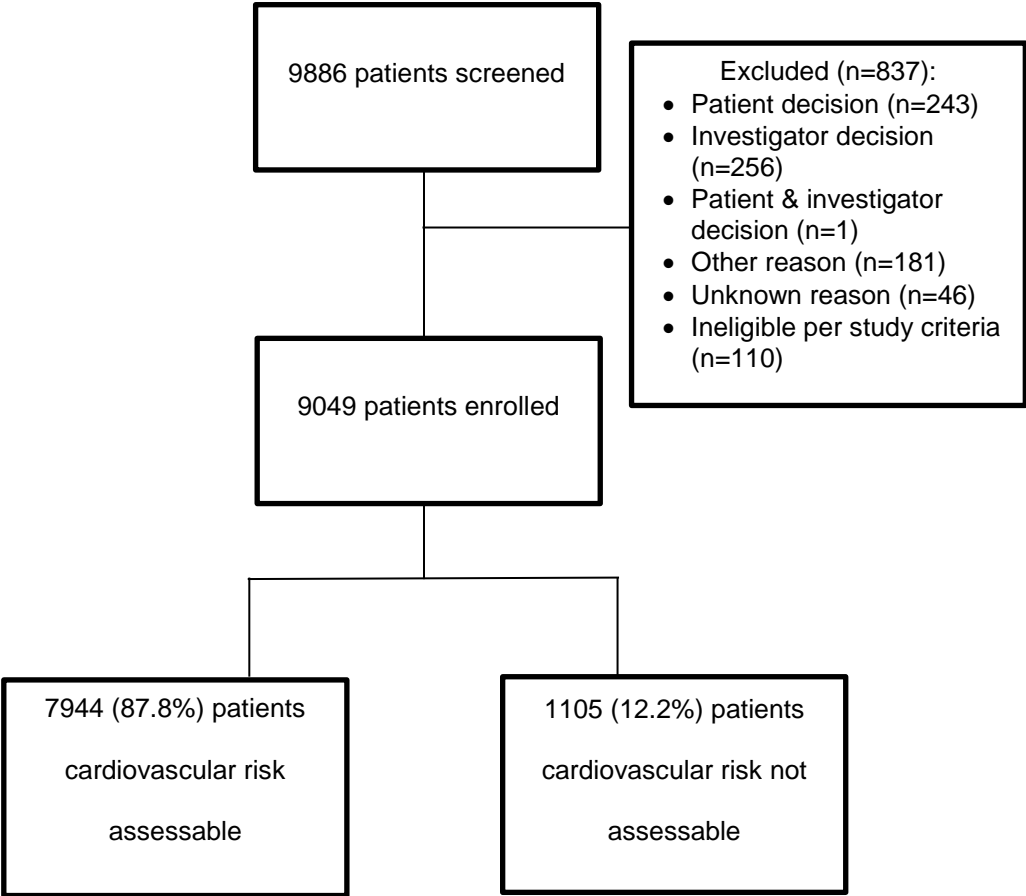



**Supplementary Figure 2 Physician-estimated assessment of patient cardiovascular risk versus calculated risk (calculated using SCORE<sup>1</sup>) (weighted Kappa 0.22 (95% confidence interval 0.21–0.23). Physician-estimated risk was unknown in 1 patient.**

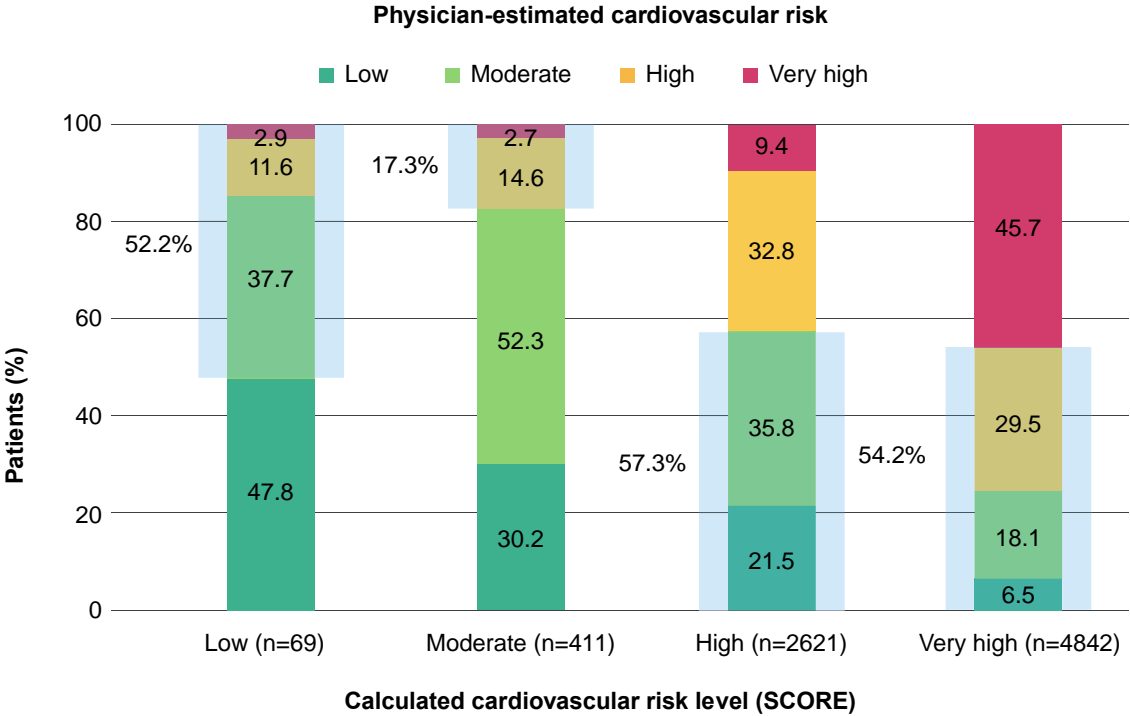

**Supplementary Figure 3. Low-density lipoprotein cholesterol value at time of first diagnosis, before starting lipid-lowering treatment, overall and according to cardiovascular risk level (calculated using Systemic Coronary Risk Estimation, SCORE<sup>1</sup>)**

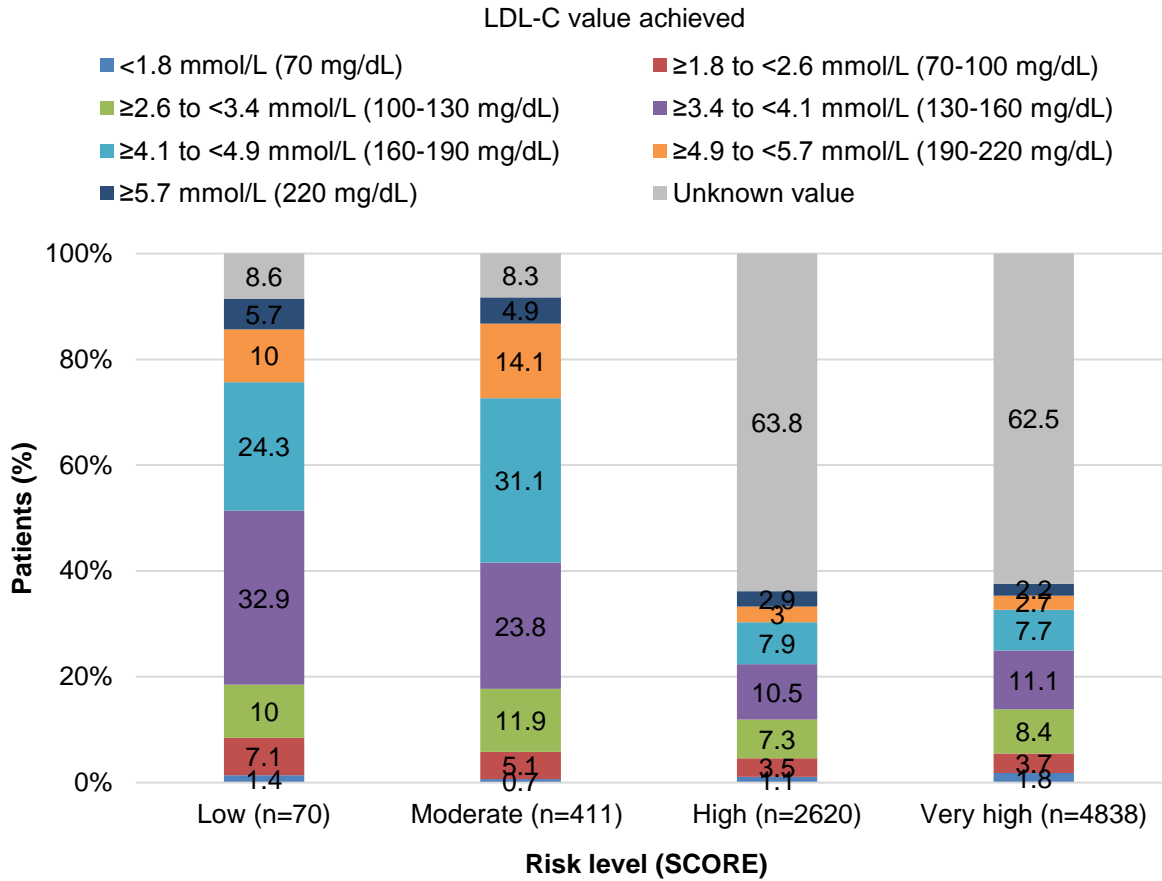

**Supplementary Figure 4. Patients who achieved the 2011 ESC/EAS LDL-C goals,<sup>2</sup> according to physician-estimated or calculated cardiovascular risk level (calculated using SCORE1). EAS, European Atherosclerosis Society; ESC, European Society of Cardiology; LDL-C, low-density lipoprotein cholesterol; SCORE, Systemic Coronary Risk Estimation.**

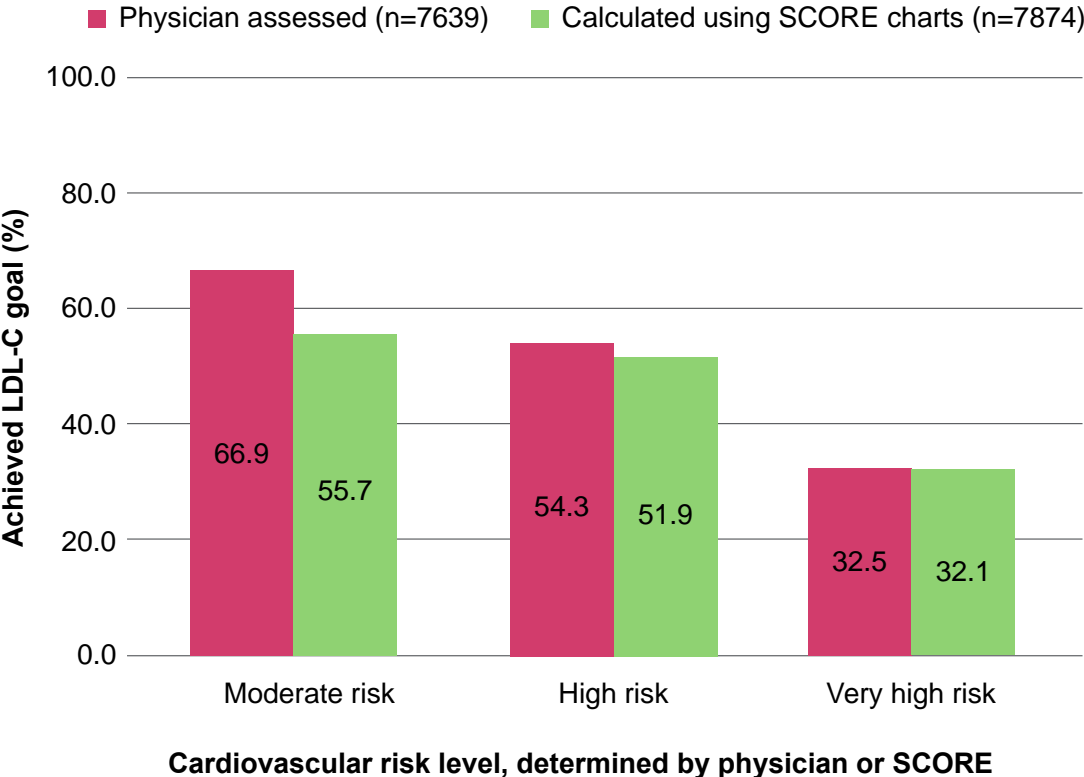

## References

1. Conroy RM, Pyorala K, Fitzgerald AP, et al. Estimation of ten-year risk of fatal cardiovascular disease in Europe: the SCORE project. *Eur Heart J* 2003; 24: 987-1003.
2. Reiner Z, Catapano AL, De Backer G, et al. ESC/EAS Guidelines for the management of dyslipidaemias: the Task Force for the management of dyslipidaemias of the European Society of Cardiology (ESC) and the European Atherosclerosis Society (EAS). *Eur Heart J* 2011; 32: 1769-1818. 2011/06/30. DOI: 10.1093/eurheartj/ehr158.
3. Stone NJ, Robinson JG, Lichtenstein AH, et al. 2013 ACC/AHA guideline on the treatment of blood cholesterol to reduce atherosclerotic cardiovascular risk in adults: a report of the American College of Cardiology/American Heart Association Task Force on Practice Guidelines. *Circulation* 2014; 129: S1-45. DOI: 10.1161/01.cir.0000437738.63853.7a.
4. World Health Organization and in collaboration with the World Heart Federation and the World Stroke Organization. *Global Atlas on cardiovascular disease prevention and control*. 2011. Geneva: World Health Organization.
